# Supplementary material for: The East Asian Winter Monsoon Acts as a Major Selective Factor in the Intraspecific Differentiation of Drought-Tolerant Nitraria tangutorum in Northwest China
Source: PubMed Central journal article supplement (PMC7570063; doi:10.3390/plants9091100), 2020-08-27
Supplement: plants-09-01100-s001.pdf [file plants-09-01100-s001.pdf]

**Supplementary Table S1.** Geographical information for the sampled populations of *Nitraria tangutorum*.

| <b>Population(code)</b> | <b>Location (All in China)</b> | <b>Latitude (N°)</b> | <b>Longitude (E°)</b> | <b>Altitude (m)</b> |
|-------------------------|--------------------------------|----------------------|-----------------------|---------------------|
| TLMX                    | Talimuxiang, Sinkiang          | 41°7.171′            | 83°27.101′            | 871.07              |
| SSST                    | Sanshisituan, Sinkiang         | 40°40.734′           | 87°26.840′            | 848.96              |
| QKL                     | Qiongkule, Sinkiang            | 38°31.464′           | 86°7.586′             | 1079.44             |
| QM                      | Qiemo, Sinkiang                | 38°13.974′           | 85°15.882′            | 1202                |
| JLT                     | Jilanta, IMG                   | 39°55.637′           | 105°40.678′           | 1035.7              |
| JCHK                    | Jichakou, IMG                  | 39°31.204′           | 105°35.870′           | 1063.34             |
| BLG                     | Balagong, IMG                  | 40°15.651′           | 107°2.023′            | 1068.14             |
| DST                     | Dashetai, IMG                  | 40°56.252′           | 108°58.737′           | 1024.4              |
| WLERG                   | Wulanerige, IMG                | 36°50.125′           | 107.00193             | 1427                |
| YG                      | Yingen, IMG                    | 40°49.815′           | 105°11.239′           | 1211.38             |
| JQ                      | Jiuquan,,Gansu                 | 40°47.886′           | 96°7.069′             | 1339                |
| WKQ                     | Weikengquan, Gansu             | 40°16.713′           | 99°49.117′            | 1138.32             |
| AYQ                     | Ayouqi, IMG                    | 39°15.065′           | 101°40.508′           | 1517.56             |
| HEY                     | Huaeryuan, Gansu               | 38°54.833′           | 102°21.508′           | 1338.27             |
| MQXX                    | Minqinxingxi, Gansu            | 38°53.584′           | 103°20.310′           | 2639                |
| HZT                     | Haizitan, Gansu                | 37°26.137′           | 103°55.303′           | 1798.74             |
| LJT                     | Luanjintan, Ningxia            | 41°42.156′           | 105°22.178            | 1427                |
| WLJ                     | Wuliji, IMG                    | 40°38.753′           | 107°8.196′            | 1252.23             |
| BLQ                     | Buliqi, IMG                    | 41°15.651′           | 107°2.023′            | 1683.62             |
| DLH                     | Delingha, Qinghai              | 37°18.824′           | 97°23.030′            | 1373                |
| LYX                     | Longyangxia, Qinghai           | 36° 7.952′           | 100°41.188′           | 1201                |

**Supplementary Table S2.** Characteristics of the primers and thermal programs for the five chloroplast DNA (cpDNA) fragments used in this study.

| Region            | Primer<br>(5'→3')                 | Sequence                                                 | Sequence<br>length(bp) | TM<br>(°C) | Reference |
|-------------------|-----------------------------------|----------------------------------------------------------|------------------------|------------|-----------|
| <i>trnH-psbA</i>  | <i>trnH</i> -F<br><i>psbA</i> -R  | CGCGCATGGTGGATTACAAATC<br>TGCATGGTTCCTTGGTAACTTC         | 680                    | 60         | [1]       |
| <i>ndhC-trnV</i>  | <i>ndhC</i> -F<br><i>trnV</i> -R  | AGACCATTCCAATGCCCCCTTTCG<br>CC<br>GTTCGAGTCCGTATAGCCCTA  | 680                    | 60         | [2]       |
| <i>psbE--petL</i> | <i>psbE</i> -F<br><i>petL</i> -R  | AACAAAAGGATTCGCAAATAAAA<br>G<br>AGTTGTTGTTCTTGTTCCTTTAGT | 680                    | 60         | [1]       |
| <i>rpl32-trnL</i> | <i>rpl32</i> -F<br><i>trnL</i> -R | GCGTATTCGTAAAAATATTTGGAA<br>TTCCTAAGAGCAGCGTGTCTACC      | 870                    | 53         | [1]       |
| <i>rps4</i>       | <i>rps4</i> -F<br><i>rps4</i> -R  | ATGTCCCGTTATCGAGGACCT<br>TACCGAGGGTTCGAATC               | 730                    | 52         | [1]       |

#### References

1. Dong, W.; Liu, J.; Yu, J.; Wang, L.; Zhou, S., Highly Variable Chloroplast Markers for Evaluating Plant Phylogeny at Low Taxonomic Levels and for DNA Barcoding. *PloS one*, **2012**, *7*, e35071.
2. Qian, C.; Yin, H.; Shi, Y.; Zhao, J.; Yin, C.; Luo, W.; Dong, Z.; Chen, G.; Yan, X.; Wang, X. R.; Ma, X. F., Population dynamics of *Agriophyllum squarrosum*, a pioneer annual plant endemic to mobile sand dunes, in response to global climate change. *Sci. Rep.* **2016**, *6*, 26613.

**Supplementary Table S3.** Variable sites of the aligned sequences in 33 haplotypes.

| Haplotype | Nucleotide variable positions |   |   |                  |   |   |   |   |   |   |   |   |          |                  |   |   |          |          |             |   |                   |   |   |   |   |   |   |
|-----------|-------------------------------|---|---|------------------|---|---|---|---|---|---|---|---|----------|------------------|---|---|----------|----------|-------------|---|-------------------|---|---|---|---|---|---|
|           | <i>ndhC-trnV</i>              |   |   | <i>trnH-psbA</i> |   |   |   |   |   |   |   |   |          | <i>psbE-petL</i> |   |   |          |          | <i>rps4</i> |   | <i>rpl32-trnL</i> |   |   |   |   |   |   |
|           | 2                             | 4 | 6 | 7                | 9 | 1 | 1 | 1 | 1 | 1 | 1 | 1 | 1        | 1                | 1 | 1 | 1        | 1        | 1           | 1 | 2                 | 2 | 2 | 2 | 2 | 3 | 4 |
|           | 9                             | 6 | 0 | 2                | 8 | 5 | 5 | 5 | 5 | 6 | 6 | 7 | 7        | 7                | 7 | 7 | 7        | 7        | 7           | 4 | 6                 | 7 | 7 | 7 | 7 | 9 | 0 |
|           | 7                             | 1 | 4 | 5                | 6 | 3 | 3 | 5 | 9 | 2 | 8 | 4 | 5        | 5                | 5 | 6 | 6        | 7        | 5           | 5 | 0                 | 2 | 3 | 3 | 3 | 7 |   |
|           |                               |   |   | 4                | 8 | 2 | 8 | 6 | 5 | 6 | 1 | 7 | 8        | 1                | 2 | 9 | 5        | 4        | 1           | 4 | 1                 | 6 | 9 | 1 |   |   |   |
| H1        | T                             | A | A | T                | G | A | G | G | T | A | T | T | A        | G                | A | G | A        | T        | A           | G | G                 | T | T | T | G | A |   |
| H2        | T                             | A | A | T                | G | A | G | T | T | A | T | T | A        | G                | G | G | A        | T        | A           | G | A                 | G | T | T | G | A |   |
| H3        | T                             | A | A | T                | G | A | G | G | T | A | T | T | A        | G                | G | G | A        | T        | A           | G | A                 | T | T | T | A | A |   |
| H4        | T                             | A | A | T                | G | A | G | G | T | A | T | T | G        | G                | G | A | A        | T        | C           | G | A                 | T | T | T | A | A |   |
| H5        | T                             | A | A | T                | G | A | G | G | T | A | T | T | G        | G                | A | A | A        | T        | C           | G | A                 | T | T | T | A | A |   |
| H6        | T                             | A | A | T                | G | A | G | G | T | A | T | T | A        | G                | G | G | A        | T        | C           | G | A                 | T | T | T | A | A |   |
| H7        | T                             | A | A | T                | G | A | G | G | T | A | T | T | G        | G                | G | A | A        | A        | A           | G | G                 | T | T | T | A | A |   |
| H8        | T                             | A | A | T                | G | A | G | G | T | A | T | T | A        | G                | G | G | A        | T        | A           | G | G                 | T | T | G | A | A |   |
| H9        | T                             | A | A | T                | G | A | G | G | G | A | T | T | G        | G                | G | A | A        | T        | A           | G | A                 | T | T | T | G | A |   |
| H10       | T                             | A | A | T                | G | A | G | G | T | A | T | T | G        | G                | G | A | A        | T        | C           | G | G                 | T | T | T | A | A |   |
| H11       | T                             | A | A | T                | G | A | G | G | T | A | T | T | G        | G                | G | A | A        | A        | A           | G | G                 | T | T | T | G | A |   |
| H12       | T                             | A | A | T                | G | A | G | G | T | A | G | A | G        | G                | G | A | A        | T        | A           | G | G                 | T | T | T | A | A |   |
| H13       | T                             | A | A | T                | G | A | G | G | T | A | T | T | G        | G                | G | A | A        | A        | A           | G | A                 | T | T | T | A | A |   |
| H14       | T                             | A | A | T                | G | A | G | G | T | A | T | T | G        | G                | G | A | A        | T        | A           | G | A                 | T | T | T | A | A |   |
| H15       | T                             | A | A | T                | G | A | G | G | T | C | T | T | A        | G                | G | G | A        | T        | A           | G | G                 | T | T | T | G | A |   |
| H16       | T                             | A | A | T                | G | A | G | G | T | A | T | T | G        | G                | G | A | A        | T        | A           | G | G                 | T | T | T | G | A |   |
| H17       | T                             | C | A | T                | G | A | G | T | T | A | T | T | G        | G                | G | A | A        | T        | A           | G | G                 | T | T | T | G | A |   |
| H18       | T                             | A | A | T                | G | A | G | T | T | A | T | T | G        | G                | G | A | A        | T        | A           | G | G                 | T | T | T | G | A |   |
| H19       | T                             | A | T | A                | A | G | G | T | A | T | T | G | <u>G</u> | G                | A | A | <u>T</u> | A        | G           | G | T                 | T | T | T | G | A |   |
| H20       | T                             | A | A | T                | G | A | G | G | T | A | G | T | A        | <u>G</u>         | G | G | A        | <u>T</u> | A           | G | G                 | T | T | T | G | A |   |
| H21       | T                             | A | A | T                | G | A | G | G | T | A | T | T | A        | C                | G | G | G        | A        | A           | G | G                 | T | T | T | G | A |   |
| H22       | T                             | A | A | T                | G | T | G | G | T | A | T | T | A        | C                | A | G | A        | T        | A           | G | G                 | T | T | T | G | A |   |
| H23       | T                             | A | T | A                | G | A | G | G | T | A | T | T | G        | G                | G | A | A        | T        | A           | G | G                 | T | T | T | G | A |   |
| H24       | T                             | A | T | A                | G | A | G | G | T | A | T | T | G        | C                | G | A | A        | T        | A           | G | A                 | T | T | T | A | A |   |
| H25       | T                             | A | T | A                | G | A | G | G | T | A | T | T | G        | G                | G | A | A        | T        | A           | G | G                 | T | G | T | G | A |   |
| H26       | T                             | A | T | A                | G | A | G | G | T | A | T | T | G        | C                | G | A | A        | T        | A           | G | A                 | G | T | T | G | A |   |
| H27       | T                             | A | A | T                | G | A | G | G | T | A | T | T | A        | G                | G | G | A        | T        | A           | A | G                 | T | T | T | G | T |   |
| H28       | T                             | A | A | T                | G | A | G | T | T | A | T | T | G        | G                | G | A | A        | T        | A           | G | A                 | G | T | T | G | A |   |
| H29       | T                             | A | A | T                | G | A | G | G | T | A | T | T | A        | G                | G | G | A        | T        | A           | G | G                 | T | T | T | G | A |   |
| H30       | T                             | A | A | T                | G | A | C | G | T | A | T | T | A        | G                | G | G | A        | <u>T</u> | A           | G | G                 | T | T | T | G | T |   |
| H31       | T                             | A | A | T                | G | A | G | G | T | A | T | T | G        | G                | G | A | A        | A        | A           | G | G                 | T | T | T | G | A |   |
| H32       | G                             | A | A | T                | G | A | C | G | T | A | T | T | A        | G                | G | G | A        | T        | A           | G | G                 | T | T | T | G | T |   |
| H33       | T                             | A | A | T                | G | A | G | G | T | A | T | T | A        | G                | G | G | A        | T        | A           | G | G                 | T | T | T | G | A |   |

**Supplementary Table S4.** Estimated results of relative contributions of the bioclimatic variables to the ecological niche of *Nitraria tangutorum*.

| <b>code</b> | <b>Bioclimatic variables</b>        | <b>Percent contribution</b> | <b>Permutation importance</b> |
|-------------|-------------------------------------|-----------------------------|-------------------------------|
| BIO19       | Precipitation in Coldest Quarter    | <b>41.7</b>                 | <b>49.1</b>                   |
| BIO11       | Mean Temperature of Coldest Quarter | <b>24.6</b>                 | <b>30.5</b>                   |
| BIO18       | Precipitation in Warmest Quarter    | 8.8                         | 4.4                           |
| BIO9        | Mean Temperature of Driest Quarter  | 5.8                         | 3.8                           |
| BIO14       | Precipitation in Driest Month       | 4.3                         | 2.9                           |
| BIO4        | Temperature Seasonality             | 3.1                         | 2.4                           |
| BIO13       | Precipitation in Wettest Month      | 2.9                         | 1.7                           |
| BIO5        | Max Temperature of Warmest Month    | 2.6                         | 1.5                           |
| BIO8        | Mean Temperature of Wettest Quarter | 2.1                         | 1.3                           |
| BIO2        | Mean Diurnal Range                  | 2.0                         | 0.9                           |
| BIO3        | Isothermality                       | 1.9                         | 1.1                           |
| BIO1        | Annual Mean Temperature             | 0.2                         | 0.4                           |

Note: Significant contributions over 10% are indicated in bold text.

**Supplementary Table S5** Twenty-four most variable regions in chloroplast genomes detected in this study.

| Code | Region                     | name                      | Forward                     | Name                      | Reverse                     |
|------|----------------------------|---------------------------|-----------------------------|---------------------------|-----------------------------|
| 1    | <i>petB-petD</i>           | <i>petB</i> -F            | CAATCCACTTTGACTCGTTTT       | <i>petD</i> -R            | GGTTCACCAATCATTGATGGTTC     |
| 2    | <i>clpP</i>                | <i>clpP</i> -F            | GCTTGGGCTTCCTTGCTGACAT      | <i>clpP</i> -R            | TCCTAATCAACCGACTTTATCGAG    |
| 3    | <i>atpH-atpI</i>           | <i>atpH</i> -F            | AACAAAAGGATTTCGCAAATAAAAG   | <i>atpI</i> -R            | AGTTGTTGTTCTTGTTCCTTAGT     |
| 4    | <i>trnH-psbA</i>           | <i>TrnH</i> -F            | CGCGCATGGTGGATTACAAAATC     | <i>PsbA</i> -R            | TGCATGGTTCCTTGGTAACTTC      |
| 5    | <i>trnT-psbD</i>           | <i>trnT</i> -F            | GCCCTTTTAACTCAGTGGTAGAG     | <i>psbD</i> -R            | CCAAATAGGAACTGGCCAATC       |
| 6    | <i>accD-psaI</i>           | <i>accD</i> -F            | GGTAAAAGAGTAATTGAACAAAC     | <i>psaI</i> -R            | GGAAATACTAAGCCCACTAAAGGCAC  |
| 7    | <i>trnS2-</i>              | <i>trnS2</i> -F           | CGGTTTTCAAGACCGGAGCTATCAA   | <i>trnG2</i> -R           | CATAACCTTGAGGTCACGGGTTCAAAT |
| 8    | <i>atpH-atpI</i>           | <i>atpH</i> -F            | AACAAAAGGATTTCGCAAATAAAAG   | <i>atpI</i> -R            | AGTTGTTGTTCTTGTTCCTTAGT     |
| 9    | <i>psbM-trnD</i>           | <i>psbM</i> -F            | TTTGACTGACTGTTTTTACGTA      | <i>trnD</i> -R            | CAGAGCACCGCCCTGTCAAG        |
| 10   | <i>ndhC-trnV</i>           | <i>ndhC</i> -F            | AGACCATTCCAATGCCCTTTTCGCC   | <i>trnV</i> -R            | GTTTCGAGTCCGTATAGCCCTA      |
| 11   | <i>ndhF</i>                | <i>ndhF</i> -F            | ACACCAACGCCATTTCGTAATGCCATC | <i>NdhF</i> -R            | AAGATGAAATTCTTAATGATAGTTGG  |
| 12   | <i>petA-psbJ</i>           | <i>petA</i> -F            | GGATTTGGTCAGGGAGATGC        | <i>psbJ</i> -R            | ATGGCCGATACTACTGGAAGG       |
| 13   | <i>psbE--petL</i>          | <i>psbE</i> -F            | ATCTACTAAATTCATCGAGTTGTTC   | <i>petL</i> -R            | TATCTTGCTCAGACCAATAAATAGA   |
| 14   | <i>ndhA</i>                | <i>NdhA</i> -F            | TCAACTATATCAACTGTACTTGAAC   | <i>NdhA</i> -R            | CGAGCTGCTGCTCAATCGAT        |
| 15   | <i>rbcL-accD</i>           | <i>rbcL</i> -F            | TAGCTGCTGCTTGTGAGGTATGGA    | <i>AccD</i> -R            | AAATACTAGGCCCACTAAAGG       |
| 16   | <i>rpl32-trnL</i>          | <i>rpl32</i> -F           | GCGTATTCGTAAAAATATTGGAA     | <i>trnL</i> -R            | TCCTAAGAGCAGCGTGTCTACC      |
| 17   | <i>rpoB-trnC</i>           | <i>rpoB</i> -F            | ACAAAATCCTTCAAATTGTATCTGA   | <i>trnC</i> -R            | TTTGTTAATCAGGCGACACCCGG     |
| 18   | <i>rps16-trnQ</i>          | <i>rps16</i> -F           | TTTATCGGATCATAAAAACCCACT    | <i>trnQ</i> -R            | TGGGGCGTGGCCAAGCGGT         |
| 19   | <i>petN-psbM</i>           | <i>petN</i> -F            | ATGGATATAGTAAGTCTCGTTGG     | <i>psbM</i> -R            | ATGGAAGTAAATATTCTTGCAAT     |
| 20   | <i>rps4</i>                | <i>rps4</i> -F            | ATGTCCCCTTATCGAGGACCT       | <i>rps4</i> -R            | TACCGAGGGTTCGAATC           |
| 21   | <i>trnK</i>                | <i>trnK</i> -F            | GGGACTCGAACCCGGAACATA       | <i>trnK</i> -R            | AGTACTCGGCTTTTAAAGTCCG      |
| 22   | <i>trnS<sup>GCU</sup>-</i> | <i>trnS<sup>GCU</sup></i> | AACGGATTAGCAATCCGACGCTTTA   | <i>trnG<sup>GCC</sup></i> | CITTTACCACTAAACTATACCCGC    |
| 23   | <i>trnS<sup>UGA</sup>-</i> | <i>trnS<sup>UGA</sup></i> | CGGTTTTCAAGACCGGAGCTATCAA   | <i>trnG<sup>UCC</sup></i> | CATAACCTTGAGGTCACGGGTTCAAAT |
| 24   | <i>trnW-psaJ</i>           | <i>trnW</i> -F            | TCTACCGAACTGAACTAAGAGCGC    | <i>psaJ</i> -R            | CGATTAATCTCTATCAATAGACCTGC  |
